# Supplementary material for: Co-adsorption and Fenton-like oxidation in the efficient removal of methylene blue by MIL-88B@UiO-66 nanoflowers
Source: Royal Society of Chemistry journal article supplement (doi:10.1039/d3dt01413d), 2023-01-01
Supplement: d3dt01413d1.pdf [file d3dt01413d1.pdf]

Electronic Supplementary Material (ESI) for Dalton Transactions.  
This journal is © The Royal Society of Chemistry 2023

## **Co-Adsorption and Fenton-like oxidation in the efficient removal of methylene blue by MIL-88B@UiO-66 nanoflowers**

Pingping Teng, Ying Liu, Zhongqiao Sun, Hao Meng, Yide Han and Xia Zhang\*

Department of Chemistry, College of Sciences, Northeastern University, Shenyang 10819, P. R. China.

\*Corresponding author

Email: xzhang@mail.neu.edu.cn (Prof. Zhang)

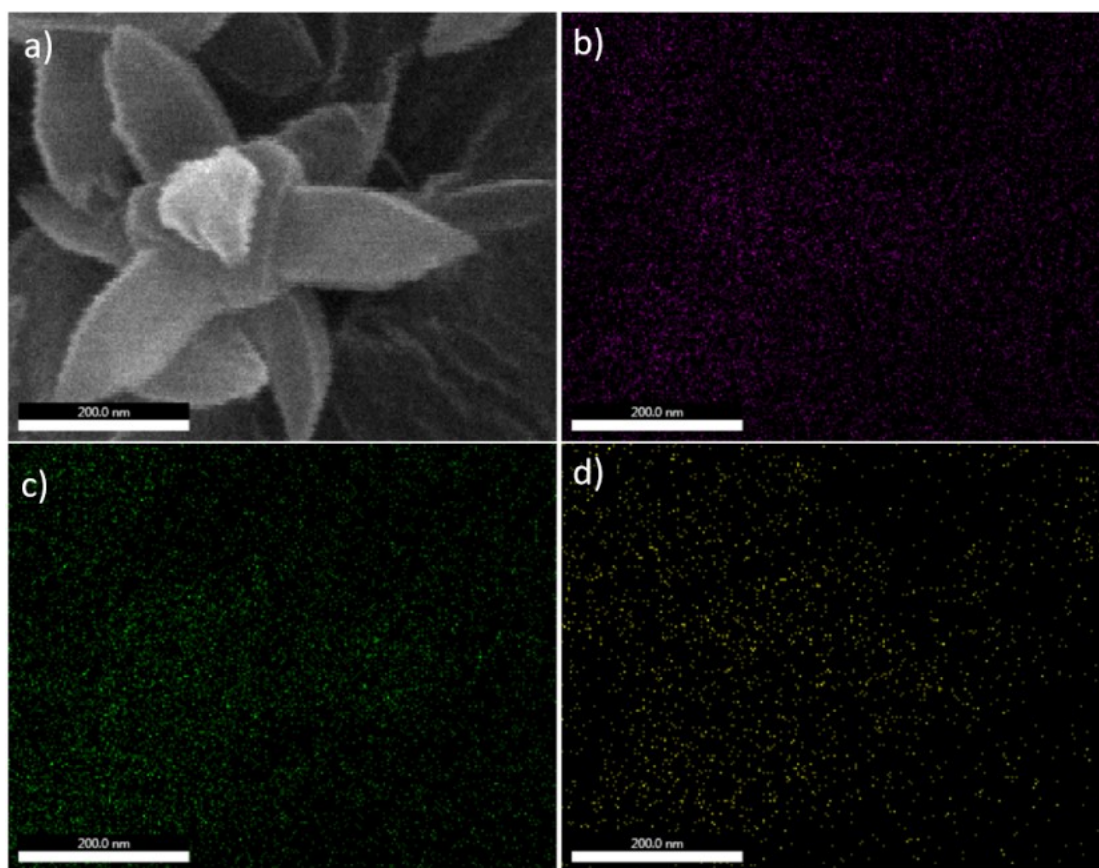

Fig. S1: (a) Scanning electron microscope image before EDS. The EDS mapping of MIL-88B@UiO-66 : (b) O; (c) Zr; (d) Fe.

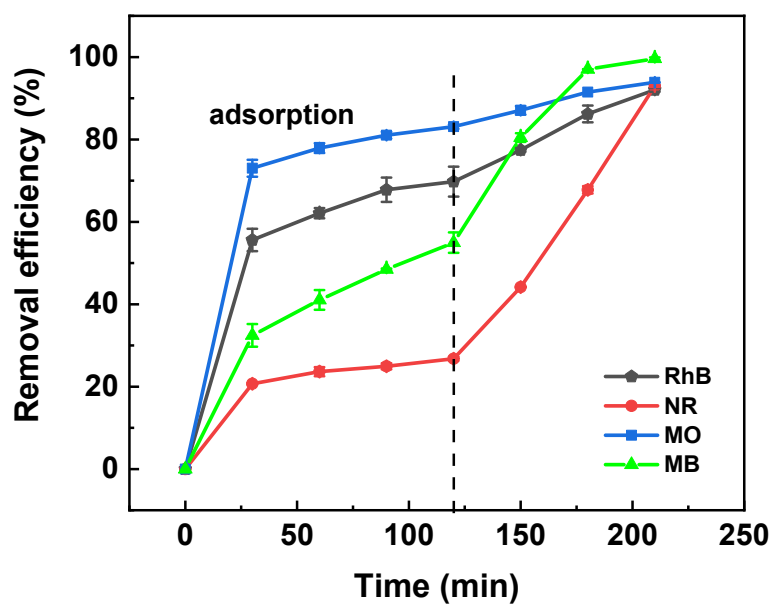

Fig. S2: Removal percentages of four dyes by MIL-88B@UiO-66.

### **The adsorption thermodynamics for the adsorption of MB on MIL-88B@UiO-66:**

The adsorption equilibrium of MB by MIL-88B@UiO-66 at elevated temperatures with an initial concentration of 100 mg/L is shown in Fig. 7c. The adsorption thermodynamic parameters including standard Gibbs free energy ( $\Delta G^\theta$ ), standard enthalpy change ( $\Delta H^\theta$ ) and entropy change ( $\Delta S^\theta$ ) can be calculated based on Eqs. (1) to (4).

$$\Delta G^\theta = -RT \ln K_D \quad (1)$$

$$\Delta G^\theta = \Delta H^\theta - T \Delta S^\theta \quad (2)$$

$$\ln K_D = -\frac{\Delta H^\theta}{RT} + \frac{\Delta S^\theta}{R} \quad (3)$$

$$K_D = \frac{q_e}{C_e} \quad (4)$$

In which,  $K_D$  is the partition coefficient of adsorption (L/mg);  $q_e$  and  $C_e$  are the adsorbed amounts (mg/g) of MB and the concentrations of MB in solution at equilibrium (mg/L), respectively;  $R$  is the gas constant (8.314 J/mol·K), and  $T$  is the absolute temperature (K). From Eq. (3), the standard enthalpy change and entropy change can be calculated using the slope and intercept of the line obtained by plotting  $\ln K_D$  versus  $1/T$  versus, and then standard Gibbs free energy is calculated by using Eq. (2).

Fig. S3 shows the variation of  $\ln K_D$  upon with  $1/T$ , the equation of the curve is simulated as  $Y = -2022.72 X + 5.33$ . The thermodynamic parameters calculated from the fitting results are shown in Table S1. It can be concluded that the adsorption of MB by MIL-88B@UiO-66 is an endothermal and entropy increase process, and the standard Gibbs free energy is a little larger than 0 at the experimental temperature.

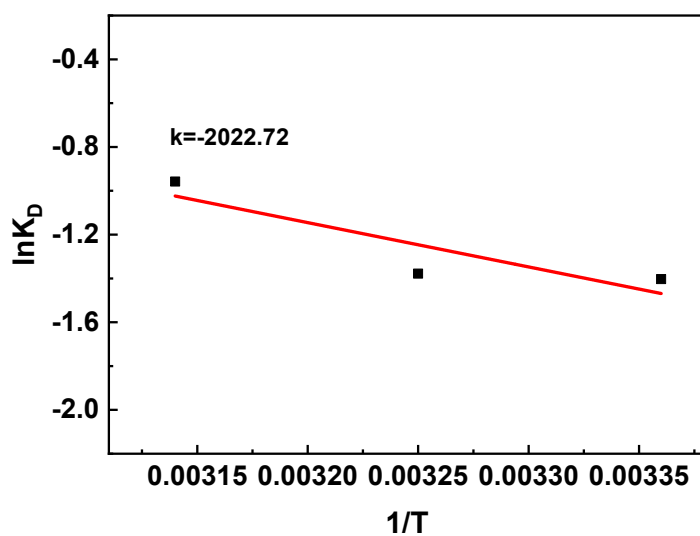

**Fig. S3:** Plotting curves of  $\ln K_D$  versus  $1/T$  for MB adsorption on MIL-88B@UiO-66.

**Table S1:** Thermodynamic parameters of MB adsorption by MIL-88B@UiO-66.

| Adsorbents | Temperature<br>/K | $\Delta H^\theta$ (KJ·mol <sup>-1</sup> ) | $\Delta S^\theta$ (J·mol <sup>-1</sup> ·K <sup>-1</sup> ) | $\Delta G^\theta$ (KJ·mol <sup>-1</sup> ) |
|------------|-------------------|-------------------------------------------|-----------------------------------------------------------|-------------------------------------------|
| MIL-       | 298               | 16.817                                    | 44.294                                                    | 3.617                                     |
| 88B@UiO-66 | 308               |                                           |                                                           | 3.174                                     |
|            | 318               |                                           |                                                           | 2.732                                     |

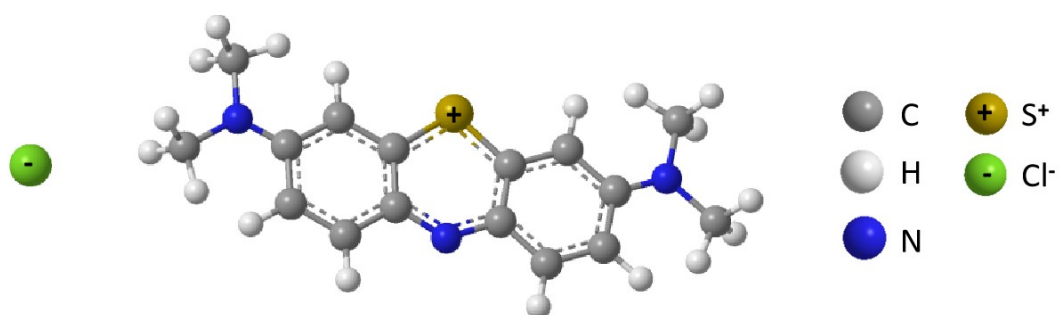

**Fig. S4:** Structure diagram of methylene blue.

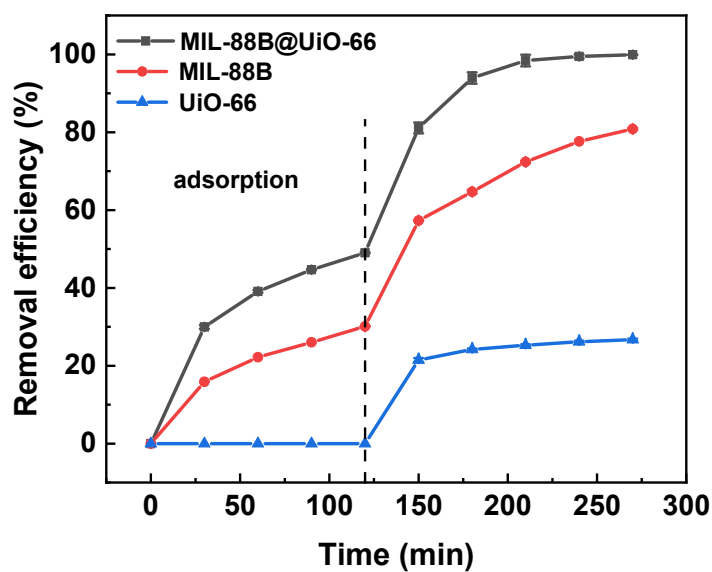

Fig. S5: Comparison of adsorption and Fenton-like catalytic properties of different MOFs. Reaction conditions:  $m(\text{MOF})=80 \text{ mg}$ ,  $n(\text{H}_2\text{O}_2)=2 \times 10^{-6} \text{ mol}$ ,  $C(\text{MB}) = 100.0 \text{ mg/L}$ ,  $V(\text{MB})=100 \text{ mL}$ ,  $T=25 \text{ }^\circ\text{C}$ .
